# Supplementary material
Source: Research Square preprint supplement (doi:10.21203/rs.3.rs-8986902/v1)
Supplement: Supplementary file 1 [file da6904acb3aba2cbc8d837a6.docx]

# **Patient Questionnaire (translated from Georgian):**

**Date of Examination ___________ Name, Surname _________ DOB: D/M/Y**__________

**Centre __________**

**Name of Examiner ___________**

1. **Sex:** ☐ Female
    ☐ Male
    ☐ Prefer not to say
2. **Highest level of education completed:** ☐ Secondary school or lower
    ☐ College / vocational training
    ☐ University degree
    ☐ Postgraduate degree
3. **Do you have a personal or family history of neurological disease (e.g., ALS, Parkinson’s disease?** ☐ Yes
    ☐ No
    ☐ Not sure

**Section 2. Presenting Symptoms**

1. **What symptoms prompted you to seek neurological consultation?** (Multiple answers allowed)

☐ Muscle fasciculations (twitching)
 ☐ Muscle weakness
 ☐ Muscle atrophy
 ☐ Fatigue
 ☐ Speech or swallowing difficulties
 ☐ Sensory symptoms (numbness, tingling)
 ☐ Other (please specify): _______

1. **How long have you been experiencing these symptoms?**

☐ <1 month
 ☐ 1–3 months
 ☐ 3–6 months
 ☐ >6 months

# **Section 3. AI and Digital Health Information Use**

1. **Before your consultation, did you search online for explanations of your symptoms?**

☐ Yes
 ☐ No

1. **Did you use AI-based symptom checkers, AI automated diagnostic platforms or generative AI platforms (e.g., ChatGPT, AI chatbots)?**

☐ Yes
 ☐ No

If **Yes**, please answer questions 9–14.

1. **Which tools did you use?** (Multiple answers allowed)

☐ Symptom checker applications
 ☐ Generative AI chatbots (e.g., ChatGPT)
 ☐ Both

1. **How frequently did you use AI tools to search for your symptoms?**

☐ Once or occasionally (≤1 time/week)
 ☐ Regularly (2–4 times/week)
 ☐ Frequently (≥5 times/week or daily)

1. **Which symptoms did you most commonly search for?**

☐ Fasciculations
 ☐ Muscle weakness
 ☐ Muscle atrophy
 ☐ Speech/swallowing difficulties
 ☐ Other: _______

1. **Did AI-generated responses mention amyotrophic lateral sclerosis (ALS) as a possible diagnosis?**

☐ Yes
 ☐ No
 ☐ Not sure

13. **When you used AI-based tools to search for your symptoms, which of the following types of interpretations did the AI-generated responses include?** *(Select all that apply)*

☐ The response emphasized a progressive or fatal neurological condition

☐ The response discussed benign or non-serious alternative explanations (e.g., benign fasciculation syndrome, stress, fatigue)

☐ The response suggested consulting a healthcare professional for further evaluation

☐ None of the above

☐ I do not remember

1. **How reliable did you consider the AI-generated information?**

☐ Not reliable
 ☐ Somewhat reliable
 ☐ Highly reliable
 ☐ More reliable than medical consultation

1. **Did AI-generated information affect your anxiety about having ALS?**

☐ Increased anxiety significantly
 ☐ Increased anxiety slightly
 ☐ No change
 ☐ Reduced anxiety

1. **After reading AI-generated information, did you:**

(Multiple answers allowed)

☐ Repeatedly check your body for symptoms
 ☐ Search for the same symptoms again online
 ☐ Seek medical reassurance from multiple clinicians
 ☐ Discuss symptoms with family/friends
 ☐ Avoid searching further ☐ Did not affect your behavior

# **Section 5. Anxiety Assessment**

**16. Patients completed the Hamilton Anxiety Rating Scale (HAM-A)** administered by a clinician.

HAM-A score recorded: _______

# **Section 6. Patient Perception, follow-up (1-3 months)**

**17. Before your neurological consultation and examinations, how likely did you believe it was that you had ALS?**

☐ Very unlikely
 ☐ Uncertain
 ☐ Likely
 ☐ Very likely

**18. After consultation and investigations, how confident are you in the medical explanation provided?**

☐ Completely reassured
 ☐ Mostly reassured
 ☐ Still somewhat worried
 ☐ Still strongly worried

**19. Did you continue using AI tools after a medical evaluation reassured you that ALS was unlikely?**

☐ Yes

☐ No

☐ Have never used AI

**20. Following medical reassurance that ALS was unlikely, did you pursue additional consultations or diagnostic tests for the same symptoms?**

☐ No further investigations were pursued
 ☐ Yes, I consulted another physician
 ☐ Yes, I requested additional diagnostic tests
 ☐ I am planning to seek further evaluation

**HAM-A score recorded(Follow-up):** _______
